# Supplementary material
Source: Springer Nature journal article supplement (https://www.springermedizin.de/resource/supplementary/13000_2012_757_MOESM8_ESM.pdf/9625382)

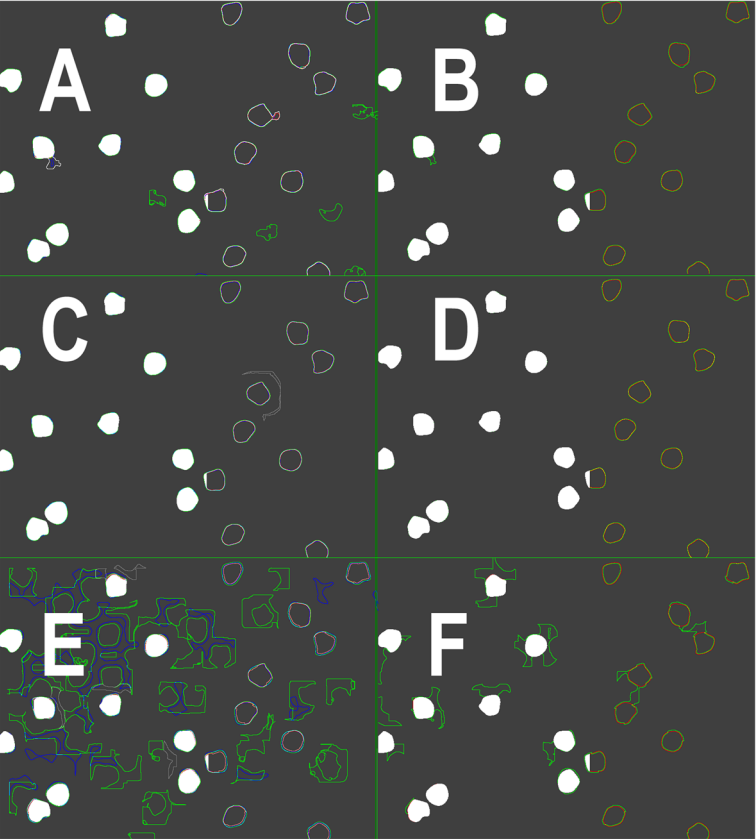

Supplement: MOESM8 [file 9625382]
